# Supplementary material for: Vaccine monitoring shows that focused immunization with SARS-CoV-2 receptor-binding domain provides a better neutralizing antibody response than full-length spike protein
Source: Research Square preprint supplement (doi:10.21203/rs.3.rs-134388/v1), 2021-01-04
Supplement: Supplementary file 1 [file 0a26b6e1058997d2ffa495f3.pdf]

## Supplementary figures

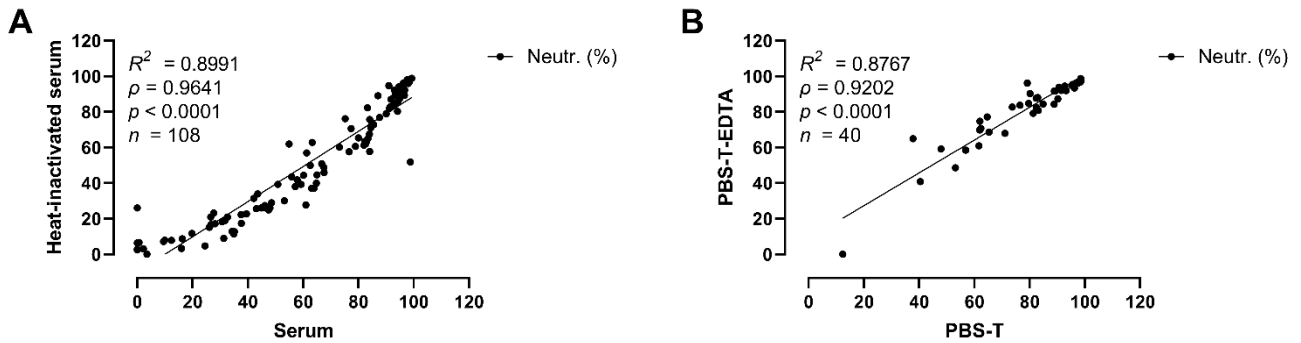

**Supplementary figure 1. Effect of buffer and sample handling in the neutralization potency of convalescent sera.** Correlation of the estimated neutralization potency of matched convalescent heat-inactivated vs non-treated serum samples (A), and serum diluted in PBS-T vs PBS-T-EDTA (B). Trend line represents the linear regression, and goodness of fit is reported as the  $R^2$ .

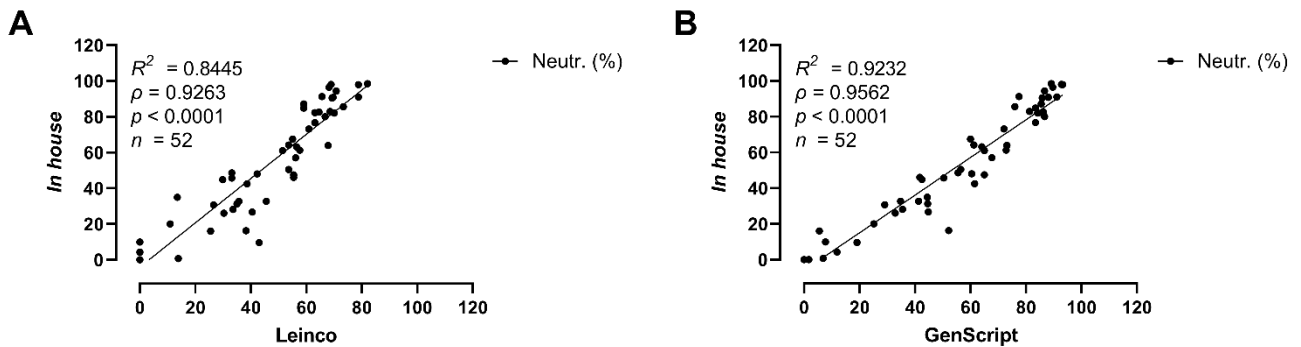

**Supplementary figure 2. Comparison of the *in house* antibody neutralization ELISA-based test with commercially-available tests.** Correlation of the estimated neutralization potency of convalescent sera with the ImmunoRank™ Neutralization MICRO-ELISA kit (Leinco Technologies, Missouri, USA) (A), and the SARS-CoV-2 surrogate virus neutralization test kit (GenScript, New Jersey, USA) (B). Trend line represents the linear regression, and goodness of fit is reported as the  $R^2$ .
